# Supplementary material for: Catalytic performance of Keplerate polyoxomolybdates in green epoxidation of alkenes with hydrogen peroxide
Source: Royal Society of Chemistry journal article supplement (doi:10.1039/c5ra12488c), 2015-01-01
Supplement: c5ra12488c1.pdf [file c5ra12488c1.pdf]

## Catalytic performance of Keplerate polyoxomolybdates in green epoxidation of alkenes with hydrogen peroxide

Fariba Jalilian<sup>a</sup>, Bahram Yadollahi<sup>a\*</sup>, Mostafa Riahi Farsani<sup>b</sup>, Shahram Tangestaninejad<sup>a</sup>, Hadi Amiri Rudbari<sup>a</sup>, Rouhollah Habibi<sup>c</sup>

<sup>a</sup>*Department of Chemistry, University of Isfahan, Isfahan 81746-73441, Iran*

<sup>b</sup>*Department of Chemistry, Shahrekord Branch, Islamic Azad University, Shahrekord, Iran*

<sup>c</sup>*Kimiatrava Tech. Co., Science & Technology Town (STT), Isfahan University of Technology, Iran*

### Supporting Information

**1. General Methods and Materials:** Mo<sub>132</sub>, Mo<sub>72</sub>V<sub>30</sub>, Mo<sub>72</sub>Fe<sub>30</sub> and Mo<sub>72</sub>Cr<sub>30</sub> prepared according to the literature methods [1–3]. All common laboratory chemicals were reagent grade, commercially prepared and used without further purification. Elemental analyses for C, S, Cr, Fe, V, Mo and K were carried out on a Perkin-Elmer 7300 DV and Leco CHNS-932 elemental analyzer. Infrared spectra (KBr pellets) were recorded on a JASCO FT/IR-6300 instrument. <sup>1</sup>H NMR spectra were recorded on a Bruker 400 (296 K) using CDCl<sub>3</sub> as solvent and TMS as an internal reference. The oxidation products were quantitatively analyzed by gas chromatography (GC) on a Chrompack CP 9001 instrument using a SIL-5CB column (50 m, 32 mm, 5 μm) and

---

\* Corresponding Author. Tel: +98-311-7932742; fax: +98-311-6689732; e-mail: [yadollahi@chem.ui.ac.ir](mailto:yadollahi@chem.ui.ac.ir), [yadollahi.b@gmail.com](mailto:yadollahi.b@gmail.com)

FID detector. Powder X-ray diffraction (XRD) data were obtained on a D8 Advanced Bruker using Cu K $\alpha$  radiation ( $2\theta = 5\text{--}80^\circ$ ).

**2. Synthesis of Mo<sub>72</sub>Cr<sub>30</sub>:** CrCl<sub>3</sub>·6H<sub>2</sub>O (8.6 g, 32.27 mmol) was added to a solution of Na<sub>2</sub>MoO<sub>4</sub>·2H<sub>2</sub>O (9.0 g, 37.2 mmol) in a H<sub>2</sub>O (80 mL)/CH<sub>3</sub>COOH (100%; 35 mL) mixture. After stirring for 5 min it was acidified with 1M HCl (17 mL; resulting pH ~2), and the solution was heated under reflux for 45 min. The cooling of resulting green solution to room temperature gave the pale green precipitate. Elemental analysis: Found: C, 2.53; Cr, 8.86; Mo, 38.80. Calc. for Mo<sub>72</sub>Cr<sub>30</sub>: C, 2.58; Cr, 8.81; Mo, 38.99%. IR (KBr pellet, cm<sup>-1</sup>): 1622 (m, H<sub>2</sub>O), 1547 (m, COO), 1423 (w, COO), 953 (m, (Mo=O)), 796 (s), 635 (w), 580 (s), 455 (w).

**3. Synthesis of Mo<sub>72</sub>Fe<sub>30</sub>:** To a stirred orange-red solution of FeCl<sub>3</sub>·6H<sub>2</sub>O (1.1 g, 4.1 mmol) and CH<sub>3</sub>COONa·H<sub>2</sub>O (1.1 g, 8.1 mmol) in H<sub>2</sub>O (75 mL), the NH<sub>4</sub><sup>+</sup> salt of Mo<sub>132</sub> (1.4 g, 0.05 mmol) was added. The resulting mixture was vigorously stirred in an open 100-mL Erlenmeyer flask (wide-necked) for 24 h. After acidification with HCl (1M, 1 mL) and addition of NaCl (2.0 g), the stirred reaction mixture was heated to 90°C and then filtered while still hot. The golden yellow filtrate was cooled to 20 °C, and yellow, rhombic crystals of Mo<sub>72</sub>Fe<sub>30</sub> formed over a period of 2-3 day. The crystals were collected by filtration through a glass frit, washed twice with a little iced water (to remove the adhering NaCl), and dried in air. Elemental analysis: Found: C, 1.50; Fe, 8.83; Mo, 38.67. Calc. for Mo<sub>72</sub>Fe<sub>30</sub>: C, 1.54; Fe, 8.95; Mo, 39.96%. Characteristic IR bands (KBr pellet, cm<sup>-1</sup>): 1622 (m, (H<sub>2</sub>O)), 1535 (m, COO), 1404 (s-m, COO), 965 (m, Mo=O), 851 (m), 776 (s), 621 (m), 571 (s), 435.

**4. Synthesis of Mo<sub>72</sub>V<sub>30</sub>:** A solution of VOSO<sub>4</sub>·5H<sub>2</sub>O (2.53 g, 10 mmol) in H<sub>2</sub>O (35 mL) was added to a stirred solution of Na<sub>2</sub>MoO<sub>4</sub>·2H<sub>2</sub>O (2.42 g, 10 mmol) in H<sub>2</sub>SO<sub>4</sub> (0.5 M; 8 mL) in a conical flask. The resulting dark purple mixture was stirred at room temperature for 30 min (flask

closed with a rubber stopper) and then treated with KCl (0.65 g, 8.72 mmol). After additional stirring for 30 min the solution was stored in the flask which was closed with a rubber stopper. After 5 days, the purple-black rhombic crystals were collected by filtration, washed with cold water, and finally dried in air. Elemental analysis: Found: K, 4.87; Mo, 35.1; S, 2.05; V, 8.38. Calc. for  $\text{Mo}_{72}\text{V}_{32}$ : K, 4.92; Mo, 36.23; S, 2.02; V, 8.55. IR (KBr pellet,  $\text{cm}^{-1}$ ): 1622 (m,  $\text{H}_2\text{O}$ ), 1198 (w), 1130 (w), 1055 (w,  $\text{SO}_4$ ), 964 (s,  $\text{V}=\text{O}/(\text{Mo}=\text{O})$ ), 791 (vs), 631 (w), 575 (s), 449 (w). The structure of prepared  $\text{Mo}_{72}\text{Fe}_{30}$ ,  $\text{Mo}_{72}\text{V}_{30}$  and  $\text{Mo}_{72}\text{Cr}_{30}$  was confirmed very well by FT-IR, elemental analysis and XRD patterns (Figure S1).

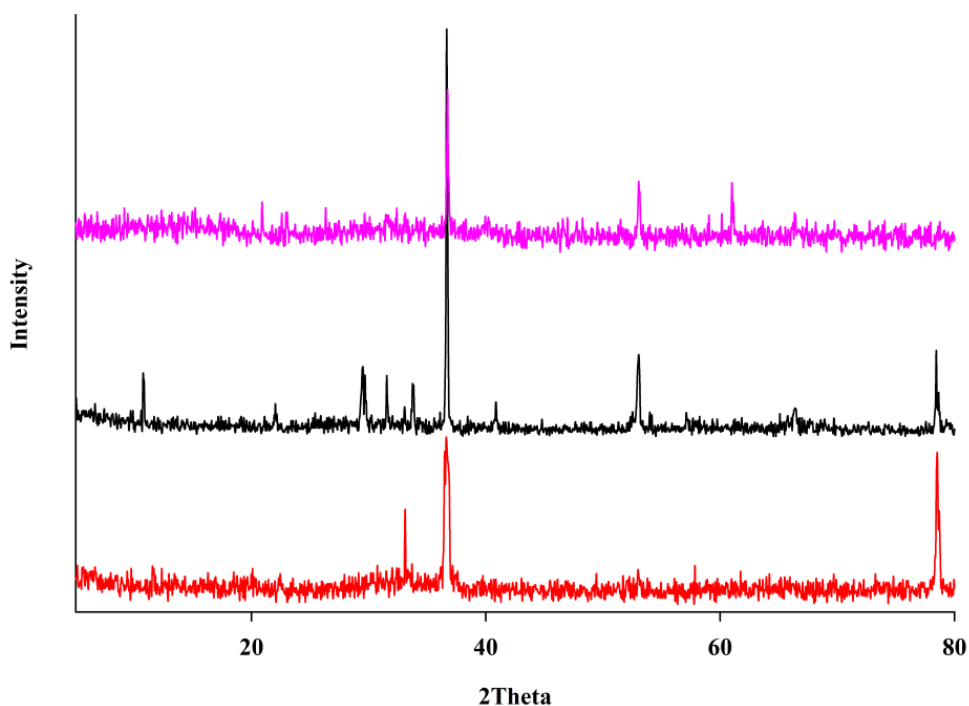

**Figure S1.** XRD pattern of  $\text{Mo}_{72}\text{V}_{30}$  (pink),  $\text{Mo}_{72}\text{Fe}_{30}$  (black) and  $\text{Mo}_{72}\text{Cr}_{30}$  (red)

**5. General procedure for epoxidation of alkenes:** The Keplerate catalyst (10  $\mu\text{mol}$ ), an alkenes (1 mmol) and water (3 mL) were added to a glass tube under air. Then, hydrogen peroxide (1 mmol, 30%) was added and the reaction mixture was stirred for appropriate time in a preheated oil bath at 50  $^{\circ}\text{C}$ . The reaction progress was monitored by TLC and GC, and the yield of products

was determined by GC analysis using toluene as the internal standard. After completion of the reaction ethyl acetate,  $3 \times 2$  mL was added, and the extraction of organic phase was followed by evaporation of solvent. Higher purification of products was achieved by chromatography over silica gel (eluent: n-hexane/ethyl acetate 80:20). For the recyclability reactions, an aqueous solution of catalyst was used for the next runs.

## 6. Gas chromatograms of standard samples in oxidation of alkenes:

a) 50 mg cyclooctene + 75 mg toluene (internal standard) in 10 mL ethyl acetate

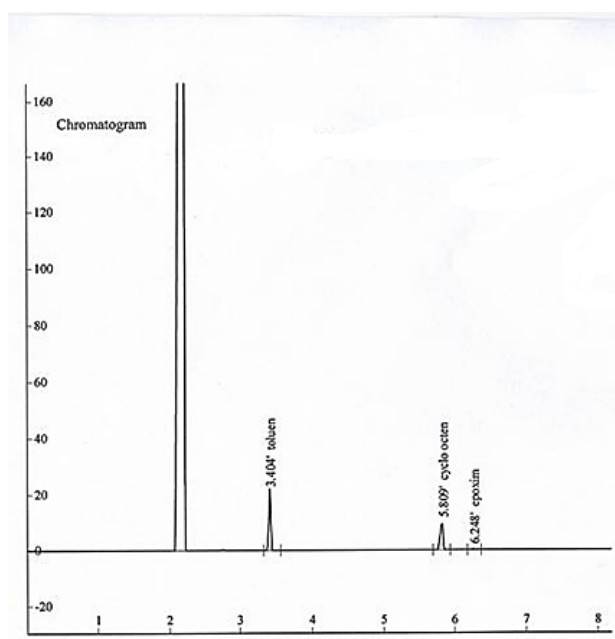

| Entry | Time  | compound    | Area% | Area  |
|-------|-------|-------------|-------|-------|
| 1     | 3.404 | toluene     | 66.82 | 40417 |
| 2     | 5.809 | cyclooctene | 32.98 | 28453 |
| 3     | 6.248 | epoxide     | 0.198 | 1026  |

b) 75 mg cyclooctene + 75 mg toluene (internal standard) in 10 mL ethyl acetate

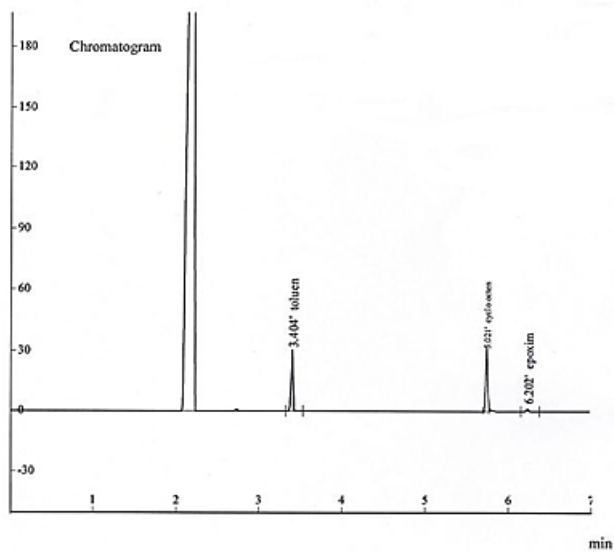

| Entry | Time  | compound    | Area% | Area  |
|-------|-------|-------------|-------|-------|
| 1     | 3.404 | toluene     | 51.17 | 44172 |
| 2     | 5.021 | cyclooctene | 48.35 | 40875 |
| 3     | 6.202 | epoxide     | 0.48  | 3889  |

c) 100 mg cyclooctene + 75 mg toluene (internal standard) in 10 mL ethyl acetate

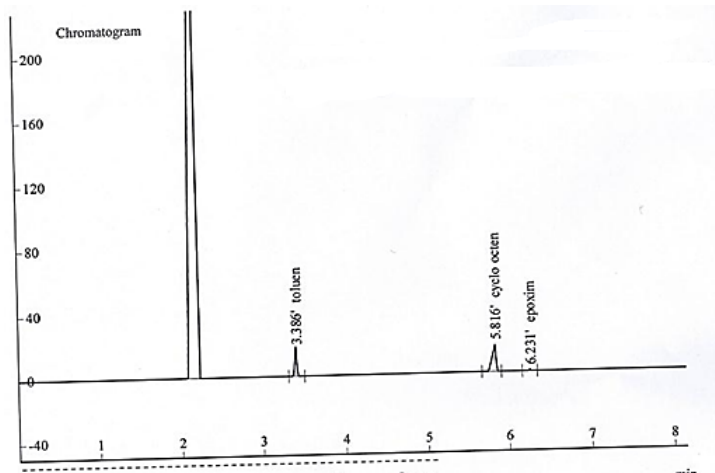

| Entry | Time  | compound    | Area% | Area  |
|-------|-------|-------------|-------|-------|
| 1     | 3.386 | toluene     | 48.04 | 50634 |
| 2     | 5.816 | cyclooctene | 51.72 | 52350 |
| 3     | 6.231 | epoxide     | 0.23  | 1856  |

d) 125 mg cyclooctene + 75 mg toluene (internal standard) in 10 ml ethyl acetate

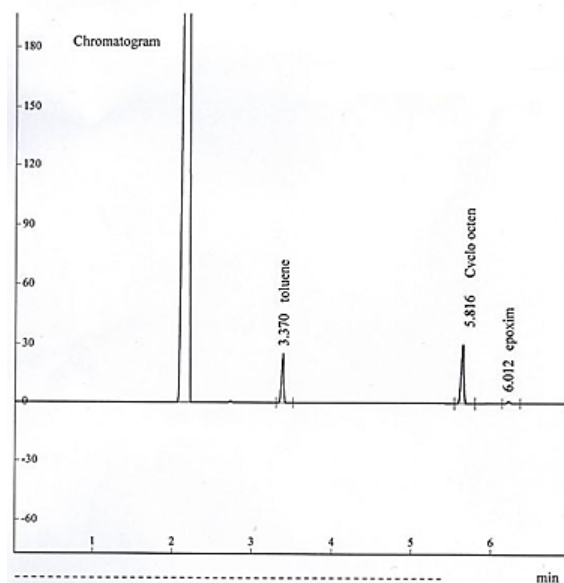

| Entry | Time  | compound    | Area% | Area  |
|-------|-------|-------------|-------|-------|
| 1     | 3.370 | toluene     | 30.44 | 44172 |
| 2     | 5.816 | cyclooctene | 69.35 | 10875 |
| 3     | 6.012 | epoxide     | 0.21  | 2089  |

## 9. Gas chromatogram of epoxidation reaction mixture

a) Epoxidation of cyclooctene by  $\text{Mo}_{72}\text{Cr}_{30}$  after 1h reaction

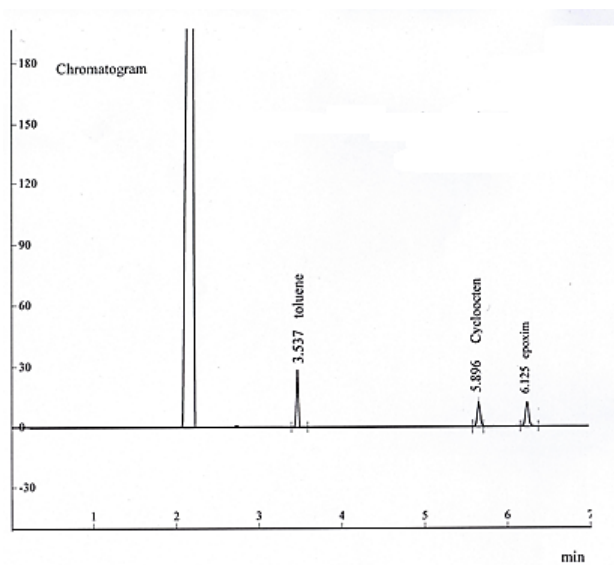

| Entry | Time  | compound    | Area% | Area  |
|-------|-------|-------------|-------|-------|
| 1     | 3.537 | toluene     | 41.17 | 98125 |
| 2     | 5.896 | cyclooctene | 31.35 | 67582 |
| 3     | 6.125 | epoxide     | 26.48 | 52556 |

b) Epoxidation of cyclooctene by  $\text{Mo}_{72}\text{V}_{30}$  after 1h reaction

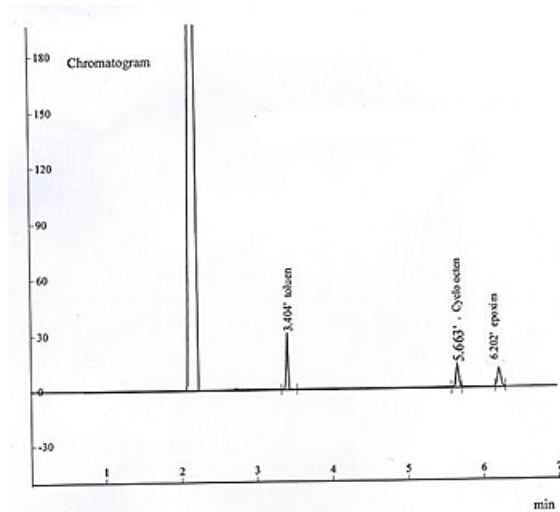

| Entry | Time  | compound    | Area% | Area  |
|-------|-------|-------------|-------|-------|
| 1     | 3.404 | toluene     | 44.17 | 68128 |
| 2     | 5.663 | cyclooctene | 34.35 | 59752 |
| 3     | 6.202 | epoxide     | 21.48 | 32819 |

c) Epoxidation of cyclooctene by  $\text{Mo}_{72}\text{Fe}_{30}$  after 1h reaction

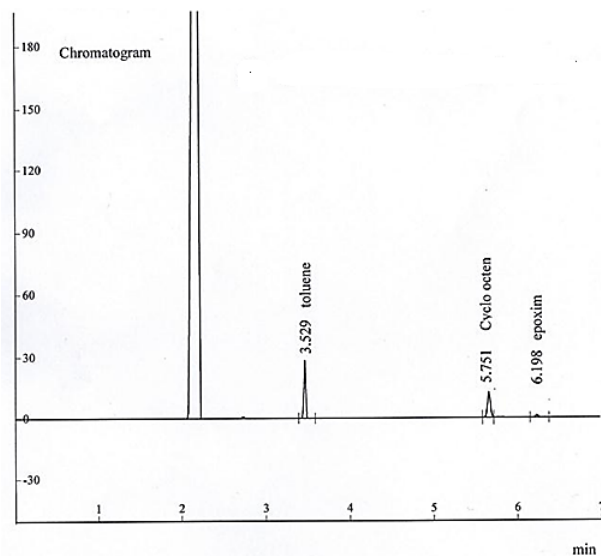

| Entry | Time  | compound    | Area% | Area  |
|-------|-------|-------------|-------|-------|
| 1     | 3.404 | toluene     | 57.17 | 91125 |
| 2     | 5.663 | cyclooctene | 41.35 | 67582 |
| 3     | 6.202 | epoxide     | 0.96  | 3505  |

## References

1. A. Müller, E. Krickemeyer, H. Bögge, M. Schmidtman and F. Peters, *Angew. Chem. Int. Ed.*, 1998, **37**, 3360–3363.
2. A. Müller, S. Sarkar, S. Q. N. Shah, H. Bögge, M. Schmidtman, Sh. Sarkar, P. Kögerler, B. Hauptfleisch, A. X. Trautwein and V. Schünemann, *Angew. Chem. Int. Ed.*, 1999, **38**, 3238–3241.
3. A.M. Todea, A. Merca, H. Bögge, J. V. Slageren, M. Dressel, L. Engelhardt, M. Luban, T. Glaser, M. Henry and A. Müller, *Angew. Chem. Int. Ed.*, 2007, **119**, 6218–6222.
